# Supplementary material for: Flightless I interacts with NMMIIA to promote cell extension formation, which enables collagen remodeling
Source: PubMed Central journal article supplement — Mol Biol Cell. 2015 Jun 15;26(12):2279–97. doi: 10.1091/mbc.E14-11-1536 (PMC4462945; doi:10.1091/mbc.e14-11-1536), 2015-06-15
Supplement: supp_E14-11-1536v1_CombinedSupMats.pdf [file supp_E14-11-1536v1_CombinedSupMats.pdf]

# Supplemental Materials

*Molecular Biology of the Cell*

Arora et al.

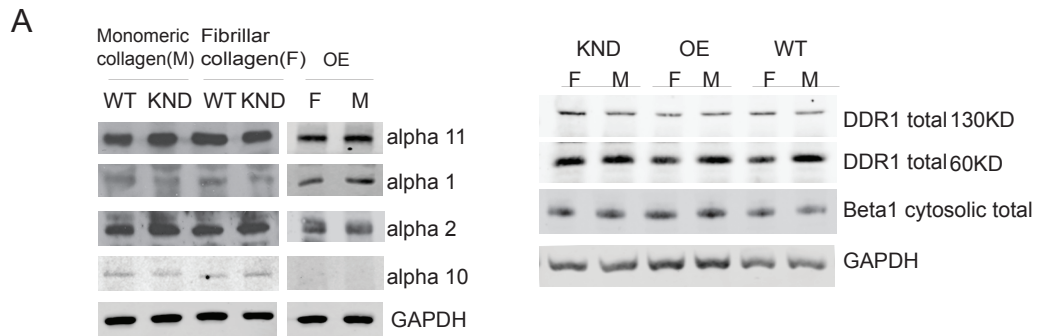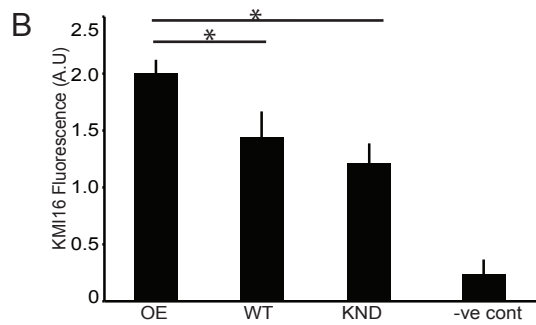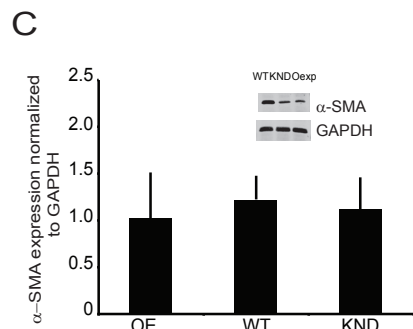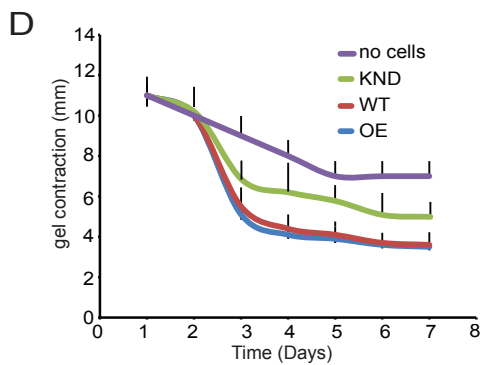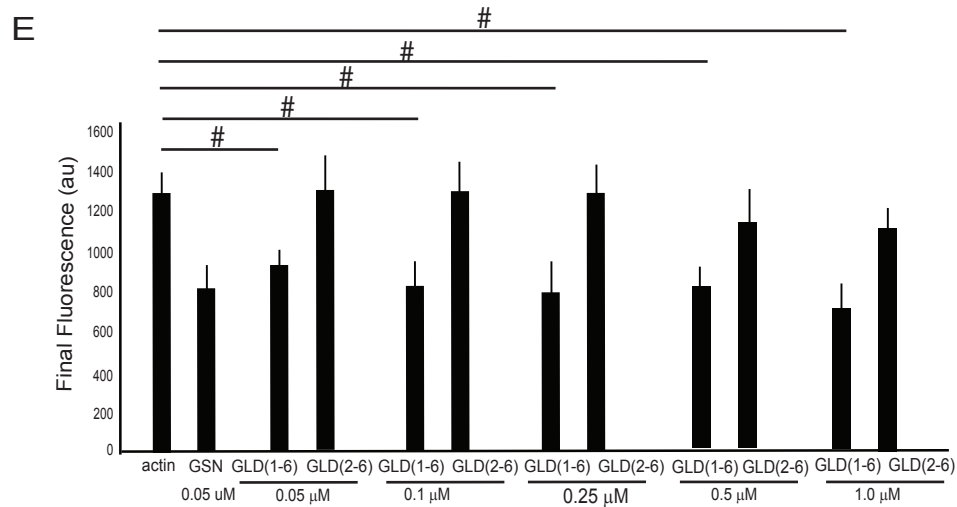

A i

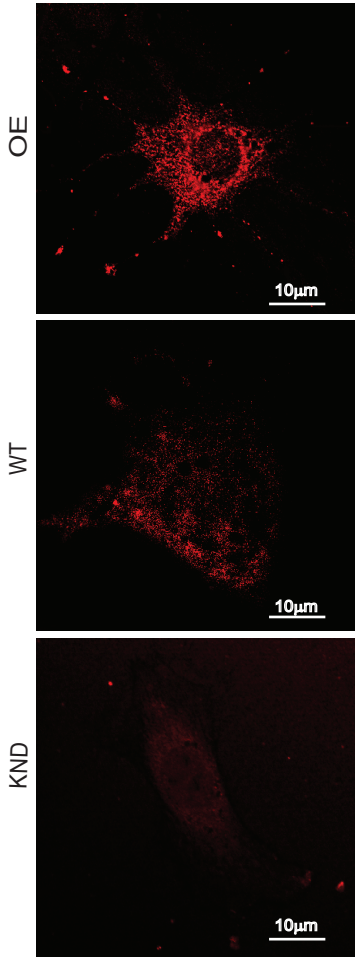

anti-coll1-3/4 fragment

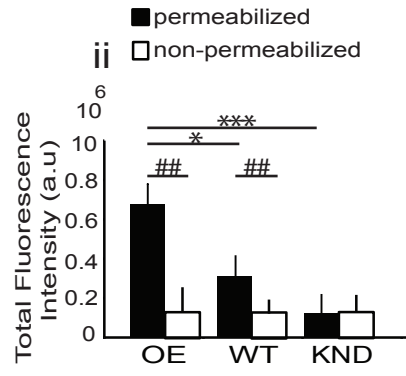

B

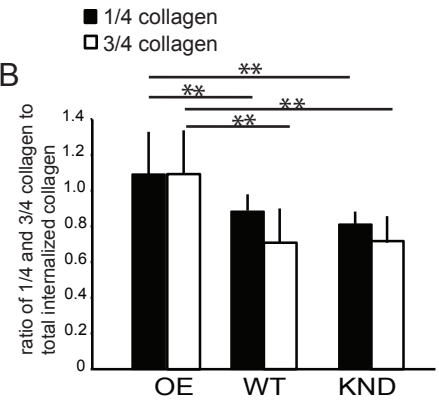

**Supplementary Fig. 1 A** Expression levels of  $\alpha 1$ , 2, 10, 11 integrins,  $\beta 1$  integrin (total cytosolic), and DDR1 in FliI OE, WT and KND cells plated on fibrillar or monomeric collagen for 30 mins. **B**-Non-permeabilized cells stained with KMI16 antibody and analyzed by flow cytometry show cell surface expression levels of  $\beta 1$  integrin in different cell types. Histogram showing data reported as mean  $\pm$  SD, n=3; analysis by ANOVA. \*p<0.05 comparison of WT and FliI KND cells with FliI OE cells. **C**-  $\alpha$ -smooth muscle actin expression levels in FliI OE, WT and KND cells. **D**- Measurement of collagen gel contraction in different cell types shows reduced contraction in FliI KND cells compared with WT or FliI OE cells. **E**- End-point polymerization (measured after overnight incubation) due to capping of pyrene-labeled actin with 0.05  $\mu$ M gelsolin or with various concentrations of FliI GLD 1-6 or FliI GLD 2-6 (0.05  $\mu$ M, 0.1  $\mu$ M, 0.25  $\mu$ M, 0.5  $\mu$ M, 1.0  $\mu$ M). Data in histogram are mean  $\pm$  SD, n=3; analyzed by ANOVA; #p<0.05 comparison between purified GLD 2-6 to GLD 1-6 at different concentrations.

**Supplementary Fig.2 A i,ii** Fixed and permeabilized cells showing fluorescence of  $\frac{3}{4}$  collagen fragment immunostained cells. Note increased fluorescence in FliI OE cells compared with WT or FliI KND cells. ii- Data presented in histogram are mean  $\pm$  SD, n=3; analyzed with ANOVA; 25 cells from each group. \*p<0.05 comparison between WT and FliI OE cells; \*\*\* p<0.001 comparison between FliI KND and FliI OE cells. ii- Quantification of  $\frac{3}{4}$  collagen immunostaining in non-permeabilized cells show minimal fluorescence in all cell types but significantly different from permeabilized OE and WT cells compared to respective non-permeabilized cells, ### p<0.01. Data are reported as mean  $\pm$  SD, n=3. Analysis by ANOVA. **B**. Cells plated for four hours were trypsinized and lysates incubated with high capacity streptavidin resin. Washed and boiled samples run on SDS PAGE and blots probed for  $\frac{3}{4}$  and  $\frac{1}{4}$  collagen fragment. Histogram shows enhanced intracellular degraded collagen for  $\frac{1}{4}$  and  $\frac{3}{4}$  fragments. Data are reported as mean  $\pm$  SD, n=3 analyzed by ANOVA. \*\*p<0.01 for  $\frac{1}{4}$  fragment; \*\* p<0.01 for  $\frac{3}{4}$  fragment comparison of WT and FliI KND cells to FliI OE cells.
